# Supplementary material for: A giant vesicle forming single tailed chiral surfactant for enantioseparation by micellar electrokinetic chromatographyElectronic supplementary information (ESI) available: synthesis and capillary electrophoresis procedure. See http://www.rsc.org/suppdata/cc/b3/b303218c/This work was supported by a research grant (No. SP/S1/G-36/99) to J. D. by the Department of Science and Technology, Government of India. The authors also thank Dr B. Mishra for helping with the light microscopic measurements.
Source: Royal Society of Chemistry journal article supplement (doi:10.1039/b303218c), 2003-01-01
Supplement: b303218c.doc [file b303218c.doc]

Supplementary Materials

# Synthesis:

**N-[4-dodecyloxybenzoyl]-L-valine:** L-valine (0.97 gm, 8.3 mM) and NaHCO3 (0.69 gm, 8.3 mM) was dissolved in distilled water (50 ml). 4-Dodecyloxy benzoic acid NHS ester(3.35 gms, 8.3 mM) in THF (60 mL) was added to it and the reaction mixture was stirred for 24 hours at 35 oC. THF was then evaporated in rotary evaporator and the solution was filtered followed by acidification to pH 2 with dilute HCl. The white precipitate was filtered off and repeatedly washed with water followed by recrystallization from ethanol-water mixture (70:30). Yield: 2.01 gms, (60%) M.P 52-54 oC. IR (cm-1): 3307, 2925, 1712, 1639, 1539. H (200MHz,CDCl3): 7.7 (2H, d, J8.7, Ph-*H*), 6.9 (2H, d, J8.7, Ph-*H*), 6.5 (1H, d, J8.3, N*H*), 4.77 (1H, dd, J18.3, J24.9, C*H*(NH)COOH), 4.0 (2H, t, J6.5, O-C*H*2), 2.4 (1H, m, C*H*(CH3)2), 1.8 (2H, m, C*H*2-CH2-O), 1.2 (18H, m, alkyl chain), 1.0 (6H, dd, CH(C*H*3)2), 0.9 (3H, t, J5.9, CH3).C (200 MHz, CDCl3) 175.4 (*C*OOH), 167.4 (*C*ONH), 162.2, 128.9, 125.7, 114.4 (Ph-*C*), 68.2, 57.6, 31.9 (valine *C**)

**Sodium N-[4-dodecyloxybenzoyl]-L-valinate:** To a solution of N-[4-dodecyloxy-benzoyl]-L-valine (2 gms, 4.96 mM)in THF (40 mL), NaHCO3 (0.41 gm, 4.96 mM) in water (40 mL)was added and the reaction mixture was stirred for 24 hours in room temperature. THF was then evaporated and the solution was filtered thrice using Whatman filter paper. Then the aqueous solution was freeze-dried to obtain white solid desired compound, **1**, which was recrystallized from ethanol. []D25(c= 0.1, water) = +28o.

**4-Dodecyloxybenzoic acid NHS ester:** 4-Dodecyloxybenzoic acid (2.68 gms, 8.7 mM) and N-Hydroxysuccinimide (1.009 gm, 8.7 mM) was dissolved in dry THF (100 ml). Dicyclohexylcarbodiimide (1.81 gms, 8.7 mM) in dry THF (25 ml) was added to it, and the reaction mixture was stirred for 24 hours at room temperature. White precipitate of dicyclohexylurea was filtered off. Solvent was evaporated and the white crude product was recrystallized from ethanol-water (70:30) mixture. (Yield-3.35 gms, 95%) M.P 76-78 oC. H (200MHz,CDCl3): 8.09 (2H, d, J7.2 Ph-*H*), 6.97 (2H, d, J7.2, Ph-*H*), 4.0 (2H, t, J6.5, O-C*H*2), 2.89 (4H, s, NHS-*H*), 1.8 (2H, m, O-CH2-C*H*2), 1.26 (18H, m, alkyl chain), 0.9 (3H, t, J6.1, C*H*3)

**4-dodecyloxy benzoic acid:** 4-Hydroxy benzoic acid (4 gms, 28.9 mM) and K2CO3 (5.52 gms, 40 mM) was taken in anhydrous methanol (150ml). The mixture was refluxed with stirring in an oil bath for 1 hr. 1-Bromododecane (6.95 mL,28.9 mM) was added to it and the reaction mixture was further refluxed for 6 hrs. Solvent was then evaporated and the white solid crude mass was recrystallized from acidified (pH 2) ethanol-water (70:30) mixture. White crystals separates out which was filtered and repeatedly washed with water. (Yield:4.25 gm, 48%) M.P. 80-82 oC. H (200MHz, CDCl3): 8.07 (2H, d, J8.8Hz, Ph-*H*), 6.94 (2H, d, J8.8Hz, Ph-*H*), 4.0 (2H, t, J6.5, O-C*H*2), 1.8 (2H, m, O-CH2-C*H*2), 1.26 (18H, m, alkyl chain), 0.88 (3H, t, J6.1, C*H*3).

Capillary electrophoresis procedure.

The MEKC separation was performed on a PrinCE Model 560 (Prince Technologies Ltd, The Netherlands) capillary electrophoresis system equipped with a autosampler, and a Bischoff Model Lambda 1010 UV-Vis variable wavelength detector. The data were analyzed using DAX Ver. 7.1 data processing software. An untreated fused silica tube (effective length 33 cm, and a total length of 87 cm, 50 μm id) supplied by the company was used for separation. Before first use, the capillary was conditioned for 30 min with 1 M NaOH and then for 10 min with 0.1 M NaOH. Finally, the capillary was rinsed with deionized (Millipoe, Milli-Q) water (18 MΩ) for 20 min. Prior to each run, the capillary was flushed with CZE buffer for 5 min and then with the EKC buffer for 5 min to ensure reproducibility of the electroosmotic flow (EOF) velocities and migration times. The separations were performed at a constant voltage of 15 kV. Direct UV detection was employed using a detector wavelength of 230 nm. The EOF velocity was measured by injecting methanol. The injection of the samples was done by pressure at 5 mbar for 2 sec. The buffer and sample solutions were filtered through 0.22 μm one way membrane Millex (Millipore) syringe filter. Before use the buffer as well as sample solutions were degassed in a Bandelin Sonorex, RK 100H (Bandelin Electronic, Germany) ultrasonic bath, for 10 min. The separations were carried out at room temperature (~30 oC). Borate buffers in the pH range of 8–10.5 were made by dissolving sodium borate in water. The buffer pH was adjusted by adding 1 M NaOH or HCl. Aliquot of surfactant solution (prepared in buffer solution) was diluted by the corresponding buffer and the pH of the final solution was noted. The pHs were measured with a digital pH meter, EC pH 5652 ( Electronics Corporation of India Ltd., India). Sample solutions were made by dissolving racemic compounds in CZE buffer containing 5 % methanol. Concentrations of the samples were around 0.05 mg mL-1.
